# Supplementary material for: Single low-dose primaquine for blocking transmission of Plasmodium falciparum malaria – a proposed model-derived age-based regimen for sub-Saharan Africa
Source: Springer Nature journal article supplement (doi:10.1186/s12916-017-0990-6), 2018-01-18

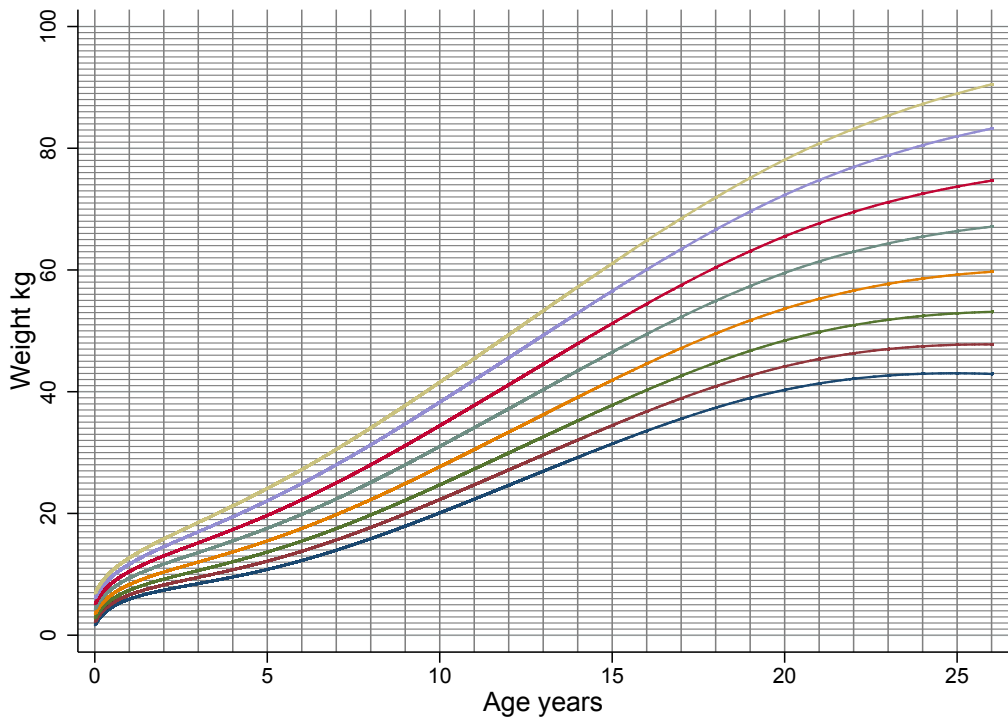

Supplement: MOESM1 [file 15374648]
